# Supplementary material for: Methylene Blue Photodegradation under Visible Irradiation on Ag-Doped ZnO Thin Films
Source: Hindawi journal article supplement (doi:10.1155/2020/1627498), 2020-01-02
Supplement: f1 [file 1627498.f1.docx]

Methylene Blue photodegradation under visible irradiation on Ag-doped ZnO thin films

| **Content** | Page |
| --- | --- |
|  |  |
|  |  |
| Figure S1 ICP Calibration curve Ag. | S2 |
| Table S1 Ag content for Ag-doped ZnO thin films. | S2 |


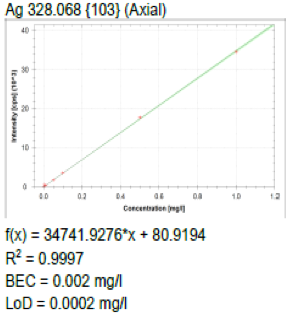


Figure S1. ICP Calibration curve for Ag content. (Equipment: ICP -OES ICAP SERIE 7200 THERMOSCIENTIFIC – Method SM 3120 B, EPA 3015A adapted for solids).

Table S1. Results ICP for Ag content in Ag-doped ZnO thin films.

| Thin films | FD | ICP CPS average signal | mg Zn | ICP CPS average | mg metal | % metal | bias |
| --- | --- | --- | --- | --- | --- | --- | --- |
| ZnO:Ag(1%) | 50 | 1588206 | 4371 | 28965 | 41.57 | 0.95 | -0.05 |
| ZnO:Ag(3%) | 500 | 1063438 | 5853 | 61712 | 181.82 | 3.11 | 0.11 |
| ZnO:Ag(5%) | 500 | 485394 | 6674 | 121787 | 358.91 | 5.38 | 0.38 |
